# Supplementary material for: Spectrum and Predictors of Adverse Drug Reactions in Patients Receiving Standard Antitubercular Therapy: A Prospective Study from Pakistan
Source: Research Square preprint supplement (doi:10.21203/rs.3.rs-7161019/v1), 2025-08-07
Supplement: Supplementary file 1 [file e52b0946122d9addd08048d7.docx]

**1. Questionnaire for ADR Documentation**

*(Structured proforma for data collection during follow-up visits)*

**Section A: Patient Demographics**

1. Patient ID: _________
2. Age: _____ years
3. Sex: ☐ Male ☐ Female
4. Weight: _____ kg
5. Height: _____ cm
6. Type of TB: ☐ Pulmonary ☐ Extrapulmonary
7. Treatment category: ☐ New case ☐ Relapse

**Section B: Clinical and Treatment Details**

1. Current ATT regimen: ☐ HRZE (Intensive phase) ☐ HR (Continuation phase)
2. Start date of ATT: ***/***/_____
3. Comorbidities:

- ☐ Hepatitis B/C ☐ Diabetes ☐ Malnutrition ☐ HIV ☐ Other: _____

**Section C: Adverse Drug Reaction (ADR) Assessment**

1. **ADR Symptoms** (Check all observed):

- **Gastrointestinal**: ☐ Nausea ☐ Vomiting ☐ Abdominal pain ☐ Anorexia
- **Dermatological**: ☐ Rash ☐ Itching ☐ Photosensitivity
- **Neurological**: ☐ Peripheral neuropathy ☐ Headache ☐ Dizziness
- **Hepatic**: ☐ Jaundice ☐ Elevated LFTs
- **Other**: ☐ Fatigue ☐ Joint pain ☐ Visual disturbances

1. **Severity Grading (CTCAE v5.0)**:
   ☐ Grade 1 (Mild) ☐ Grade 2 (Moderate) ☐ Grade 3 (Severe) ☐ Grade 4 (Life-threatening)
2. **Onset of ADR**: _____ days/weeks after ATT initiation.
3. **Action Taken**:
   ☐ Continued ATT + supportive care
   ☐ Dose adjustment
   ☐ Temporary discontinuation
   ☐ Permanent discontinuation
4. **Outcome**: ☐ Resolved ☐ Improved ☐ Unchanged ☐ Worsened

**Section D: Risk Factors**

1. Nutritional status: ☐ Normal ☐ Malnourished (BMI <18.5)
2. Concurrent medications: ________________________
3. Alcohol/tobacco use: ☐ Yes ☐ No

#### ****Consent Statement****:

"I, ___________, agree to participate in this study. I confirm that I understand the purpose, risks, and benefits."

**Signature**: _________
